# Supplementary material for: Group-Based vs Individual Pelvic Floor Muscle Training to Treat Urinary Incontinence in Older Women: A Randomized Clinical Trial
Source: PubMed Central journal article supplement (PMC7400216; doi:10.1001/jamainternmed.2020.2993), 2020-08-03
Supplement: jamainternmed-e202993-s003.pdf [file jamainternmed-e202993-s003.pdf]

## Data Sharing Statement

### Data

**Data available:** Yes

**Data types:** Deidentified participant data

**How to access data:** data will be available on request to Prof Dumoulin. Email: [chantal.dumoulin@umontreal.ca](mailto:chantal.dumoulin@umontreal.ca)

**When available:** beginning date: 05-01-2021, end date: 05-01-2026

### Supporting Documents

**Document types:** None

### Additional Information

**Who can access the data:** researchers whose proposed use of the data has been approved by ethics committee

**Types of analyses:** for any purpose

**Mechanisms of data availability:** with investigator support
